# Supplementary material
Source: PubMed Central journal article supplement (PMC7959568)
Supplement: pnas.2015095117.sapp.pdf [file pnas.2015095117.sapp.pdf]

1 **SUPPLEMENTARY INFORMATION**

2

3 **Mosquito metabolomics reveal that dengue virus replication requires**  
4 **phospholipid changes via the remodeling cycle**

5

6 **Contains:**

7 Figures S1-S13

8 Tables S1-S4

9 Legends from Datasets S1-S6

10

11 **FIGURES**

12

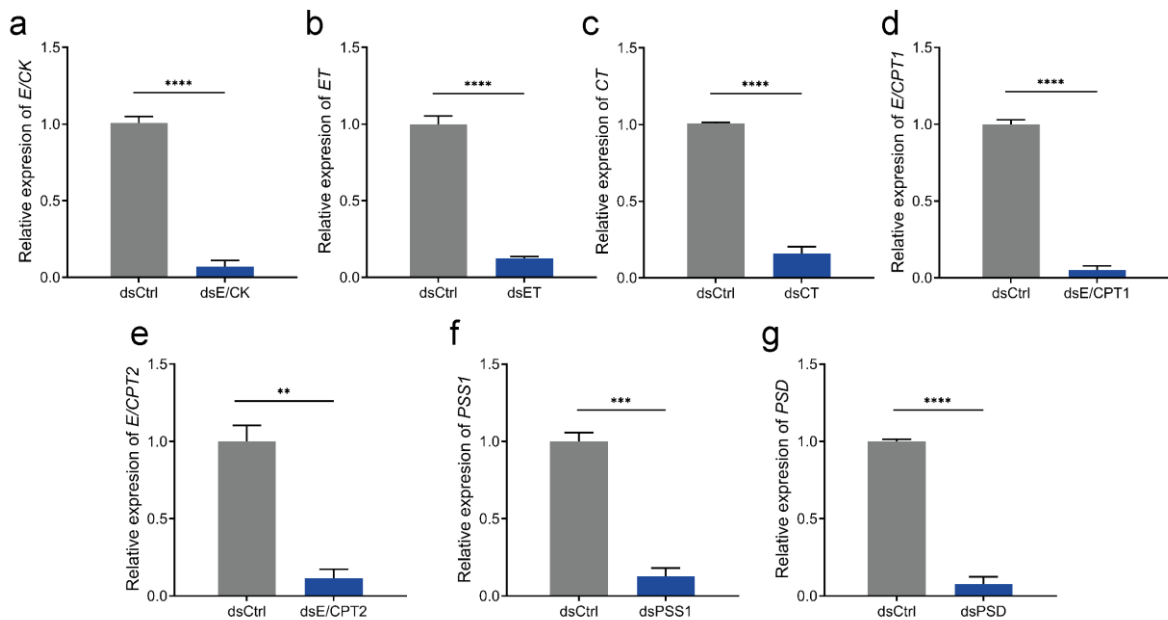

13

14 **Fig S1. Validation of silencing for *de novo* pathway enzymes.** Aag2 cells were transfected

15 with dsRNA against either (a) E/CK, (b) ET, (c) CT, (d) E/CPT1, (e) E/CPT2, (f) PSS1, (g) PSD

16 genes. DsRNA targeting LacZ (Ctrl) was used as control. At 72 h post transfection, mRNA from  
17 the targeted genes was quantified by RT-qPCR. *Actin* expression was used for normalization.  
18 Lines show mean  $\pm$  s.e.m. from 6 biological repeats. \*\*, p-value < 0.01; \*\*\*, p-value < 0.001;  
19 \*\*\*\*, p-value < 0.0001 as indicated by unpaired t-test. E/CK, ethanolamine/choline kinase; ET,  
20 CTP:phosphoethanolamine cytidyltransferase; CT, CTP:phosphocholine cytidyltransferase;  
21 E/CPT, DAG:CDP-ethanolamine/choline ethanolamine/cholinephosphotranferase; PSS1, PS  
22 synthase; PSD, PS decarboxylase.

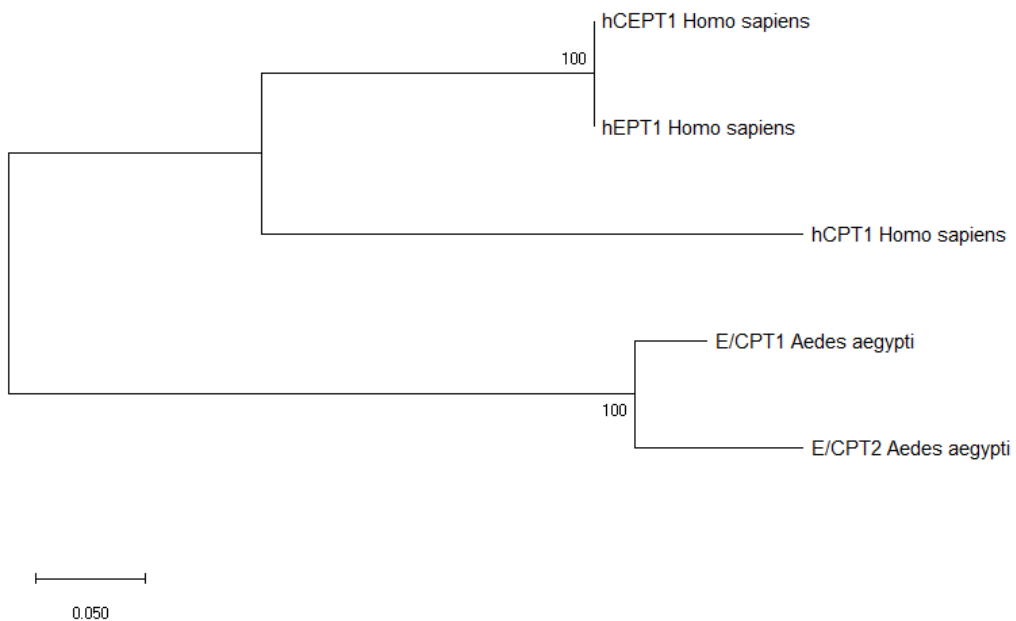

23  
24 **Fig S2. Maximum likelihood tree between CPTs and EPTs from *Ae. aegypti* and**  
25 **humans.**

26

27

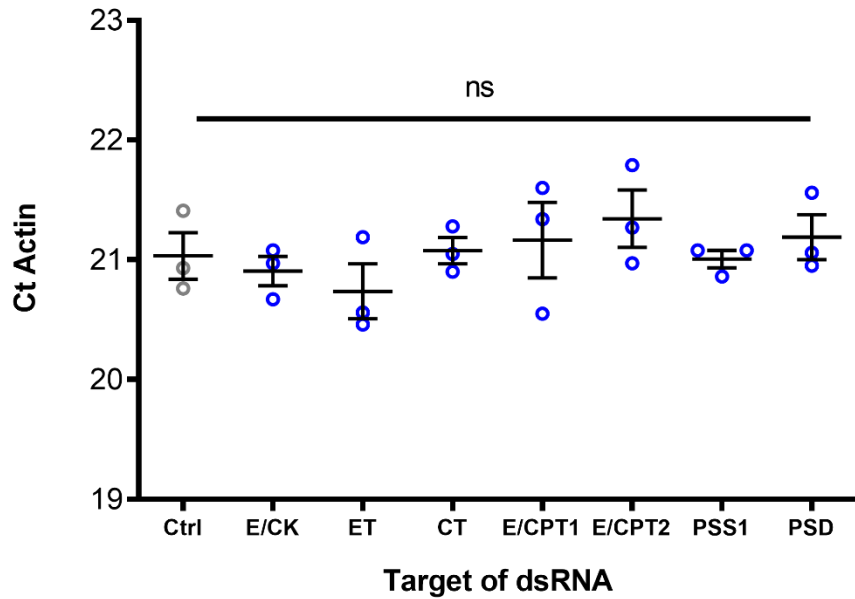

28

29 **Fig S3. Cell survival measured by *actin* gene expression.** Aag2 cells were transfected with  
 30 dsRNA against either E/CK, ET, CT, E/CPT1, E/CPT2, PSS1, PSD genes. DsRNA targeting  
 31 LacZ (Ctrl) was used as control. At 72 h post transfection, *Actin* expression was quantified.  
 32 Lines show mean  $\pm$  s.e.m. from 3 biological repeats and compared by Dunnett's multiple  
 33 comparisons test. E/CK, ethanolamine/choline kinase; ET, CTP:phosphoethanolamine  
 34 cytidyltransferase; CT, CTP:phosphocholine cytidyltransferase; E/CPT, DAG:CDP-  
 35 ethanolamine/choline ethanolamine/cholinephosphotranferase; PSS1, PS synthase; PSD, PS  
 36 decarboxylase.

37

38

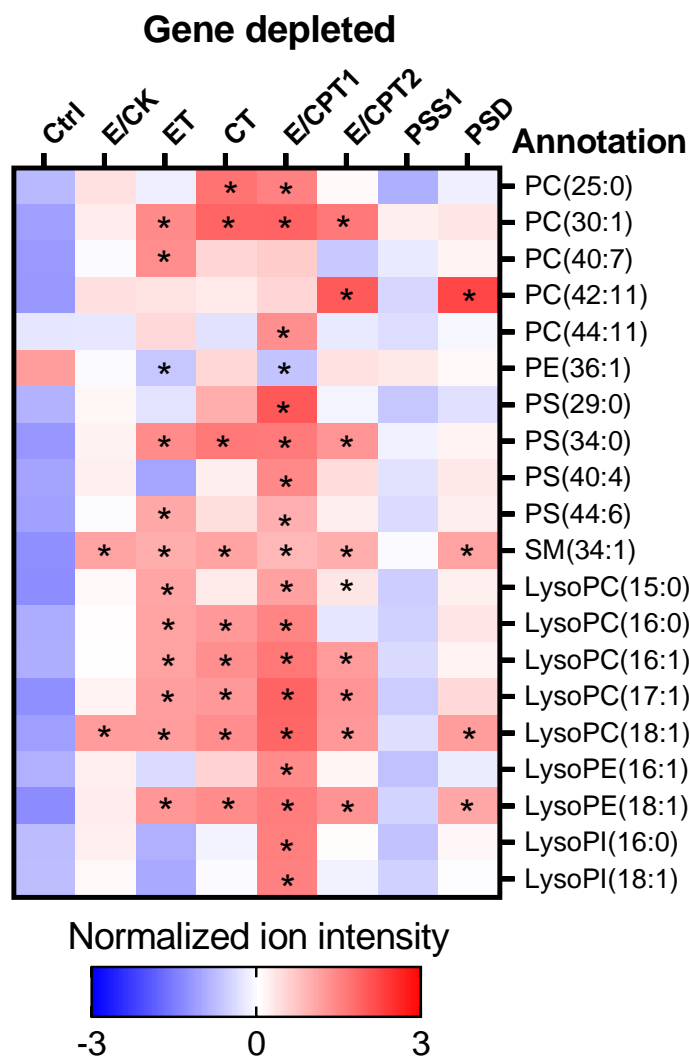

39

40 **Fig S4. Ion intensity of regulated metabolites in DENV-infected cells after *de novo***

41 **pathway gene depletion.** Normalized ion intensity was calculated after total ion

42 chromatography normalization and auto scaling from three biological replicates. Conditions

43 with significantly regulated metabolites (p-value <0.05 and |log2 fold change| >1) were

44 indicated with an asterisk. PE, phosphatidylethanolamine; PC, phosphatidylcholine; PS,

45 phosphatidylserine; LysoPC, lysophosphatidylcholine; LysoPE, lysophosphatidylethanolamine;

46 LysoPI, lysophosphatidylinositol; SM, Sphingomyelin; Ctrl, Control dsRNA.

47

48

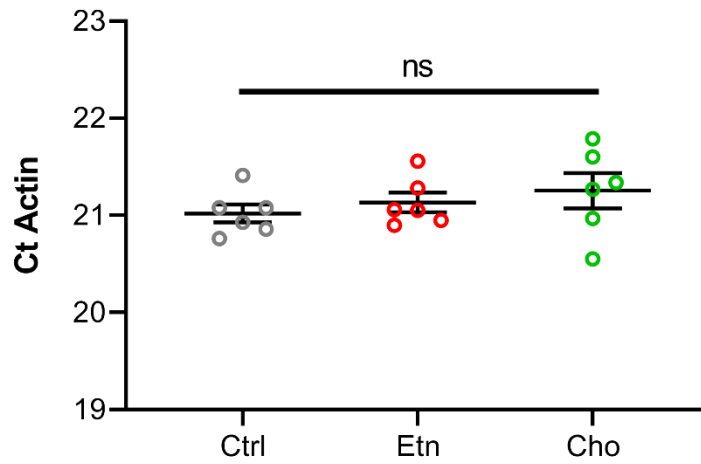

49

50

51 **Fig S5. Cell survival measured by *Actin* gene expression in ethanolamine or choline**  
 52 **supplemented cells.** Aag2 cells were supplemented with either ethanolamine (Etn) or choline  
 53 (Cho) and compared to standard growth media (Ctrl). At 24h post supplementation, *Actin*  
 54 expression was quantified. Lines show mean  $\pm$  s.e.m. from 6 biological repeats and compared  
 55 by Dunnett's multiple comparison test.

56

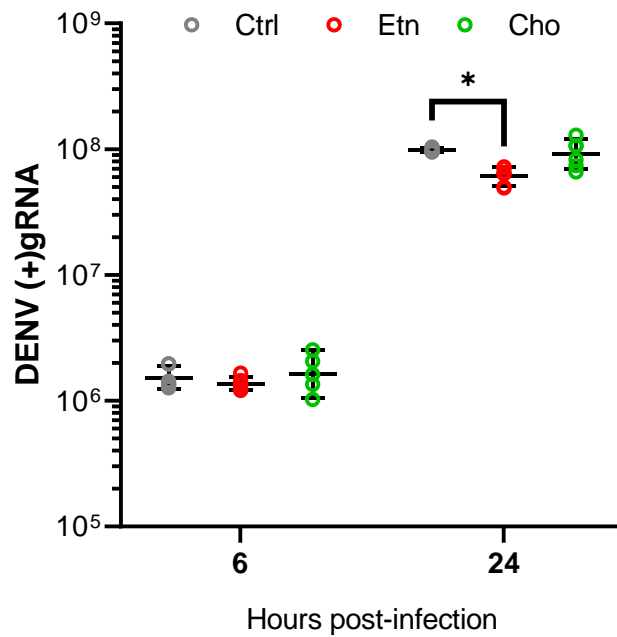

57

58 **Fig S6. Impact of ethanolamine and choline supplementations on DENV replication after**  
 59 **infection at MOI 5.** Aag2 cells were supplemented with either ethanolamine (Etn) or choline  
 60 (Cho) and compared to standard growth media (control). At 24h post supplementation, cells  
 61 were infected with DENV at MOI 5. Cellular DENV (+)gRNA was quantified at 6 and 24 hpi.  
 62 Lines show geometric mean  $\pm$  95% CI from 6 biological repeats. \* p-value < 0.05, as  
 63 determined by Dunnett's multiple comparisons test.

64

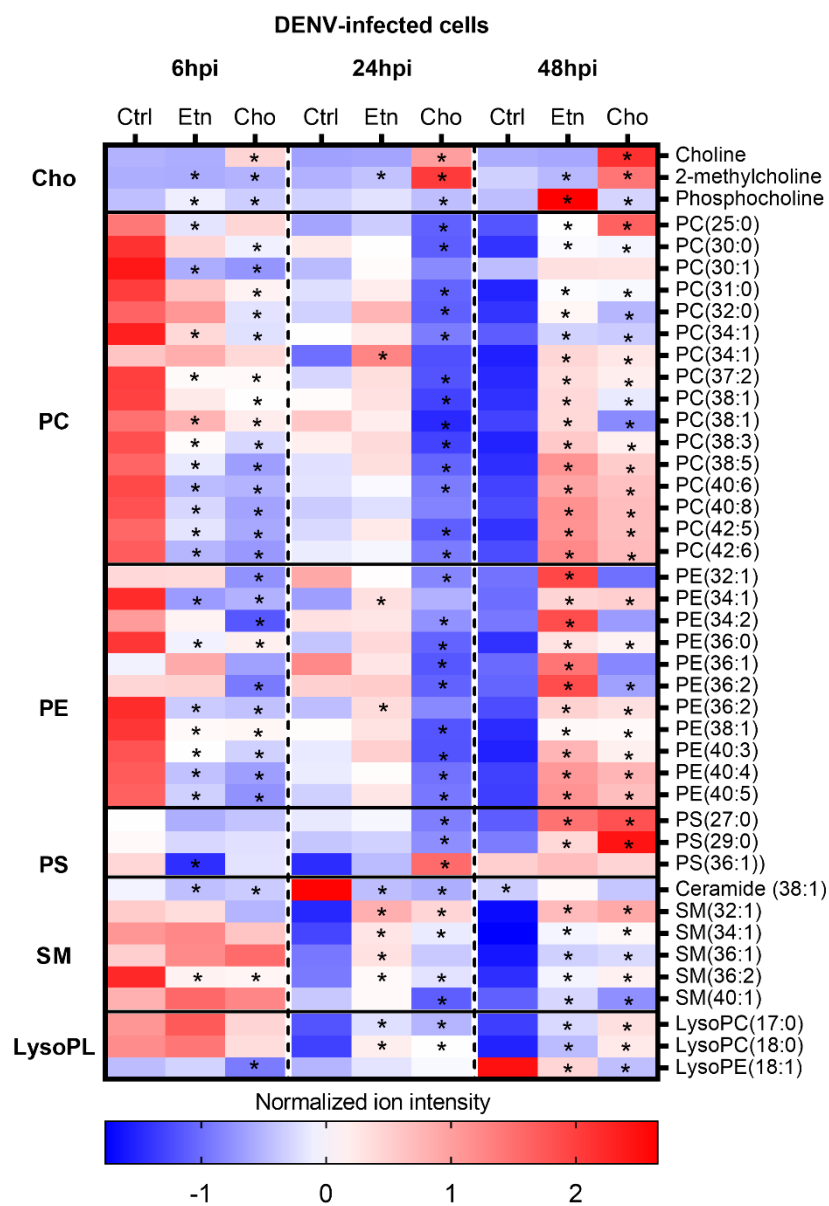

65

66 **Fig S7. Ion intensity of regulated metabolites in choline or ethanolamine supplemented**  
 67 **cells infected with DENV.** Normalized ion intensity was calculated after total ion  
 68 chromatography normalization and auto scaling from three biological replicates. Conditions  
 69 with significantly regulated metabolites (p-value <0.05 and |log2 fold change| >1) were  
 70 indicated with an asterisk. Cho, choline; Etn, Ethanolamine; PE, phosphatidylethanolamine;  
 71 PC, phosphatidylcholine; PS, phosphatidylserine; LysoPL, lysophospholipid LysoPC,  
 72 lysophosphatidylcholine; LysoPE, lysophosphatidylethanolamine; SM, Sphingomyelin;

73

74

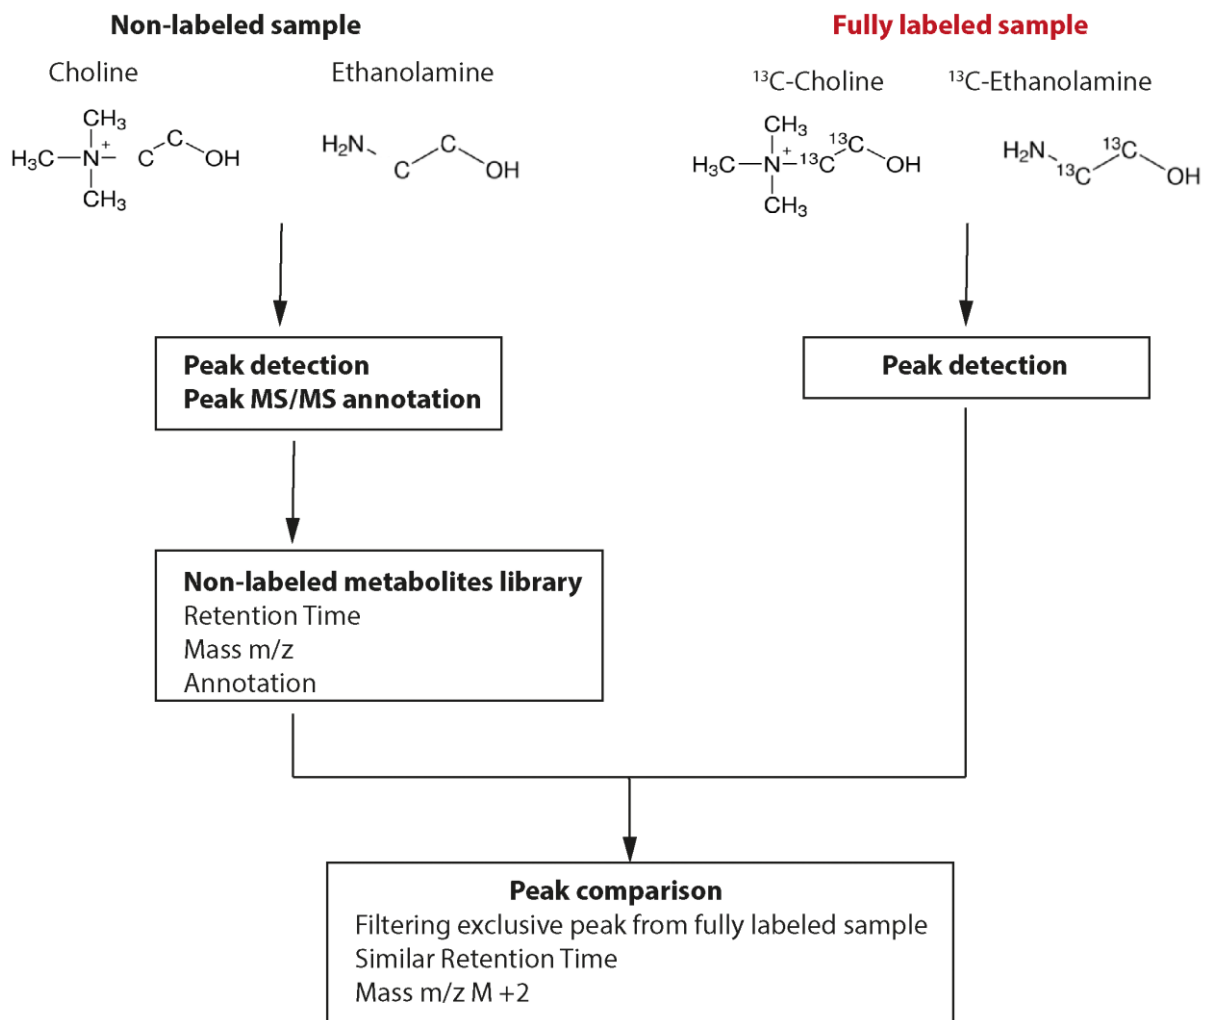

75

76 **Fig S8. Scheme to identify isotope labeled <sup>13</sup>C ethanolamine or choline incorporation**  
 77 **in phospholipids.**

**<sup>13</sup>C-Ethanolamine supplementation**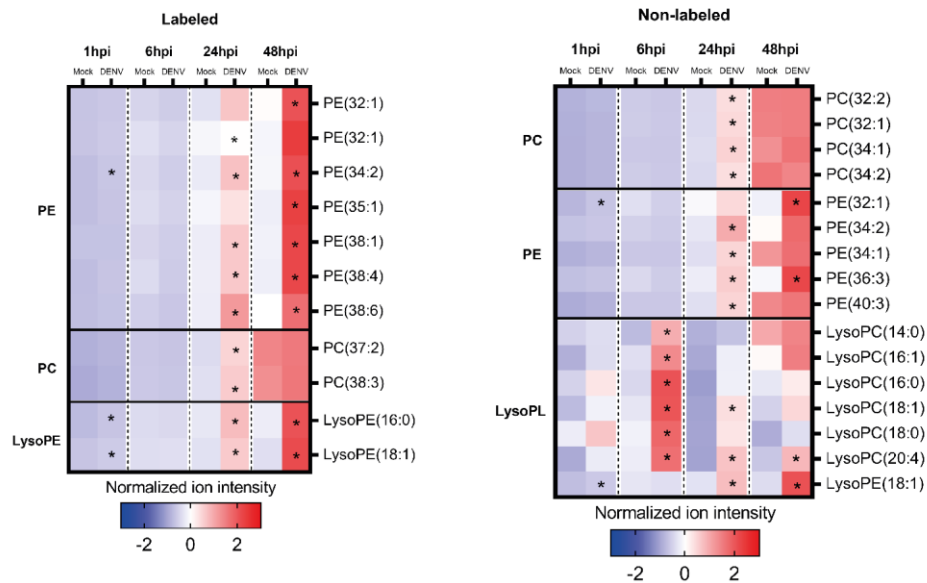**<sup>13</sup>C-Choline supplementation**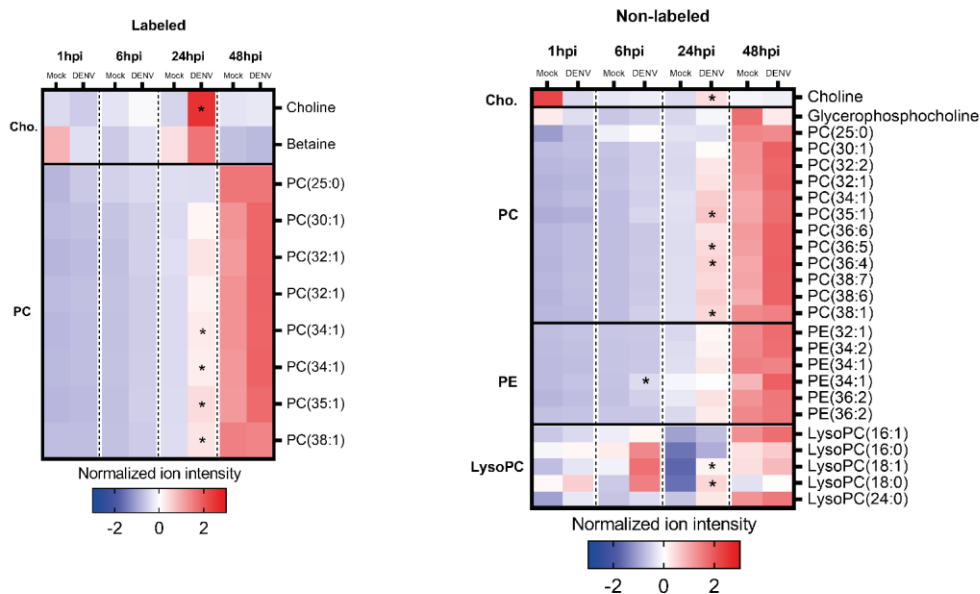

79

80 **Fig S9. Ion intensity of regulated metabolites in choline or ethanolamine**  
 81 **supplemented cells infected with DENV.** Normalized ion intensity was calculated after total  
 82 ion chromatography normalization and auto scaling from three biological replicates.  
 83 Conditions with significantly regulated metabolites ( $p$ -value  $<0.05$  and  $|\log_2$  fold change  $>1$ )  
 84 were indicated with an asterisk. Cho, choline; Etn, Ethanolamine; PE,



85 phosphatidylethanolamine; PC, phosphatidylcholine; PS, phosphatidylserine; LysoPL,  
86 lysophospholipid LysoPC, lysophosphatidylcholine; LysoPE, lysophosphatidylethanolamine;  
87 SM, Sphingomyelin;

88

89

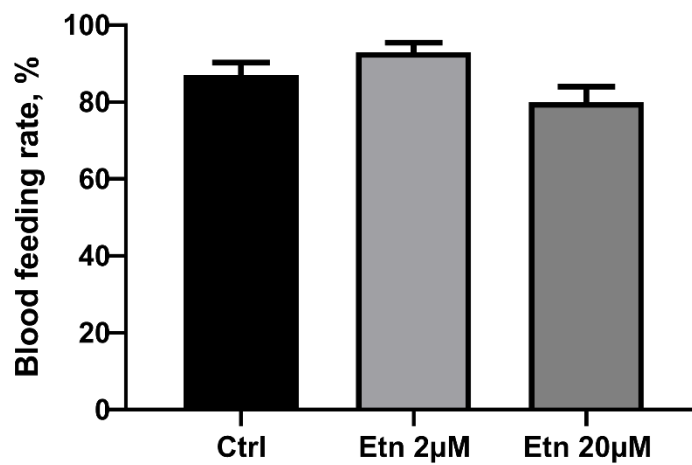

90

91 **Fig S10. Impact of Ethanolamine supplementation on mosquito blood feeding.** Blood  
92 feeding rate was calculated as the percentage of mosquitoes that imbibed blood over the total  
93 number of mosquitoes that were offered the infectious blood meal. Lines represent percentage  
94 + s.e.

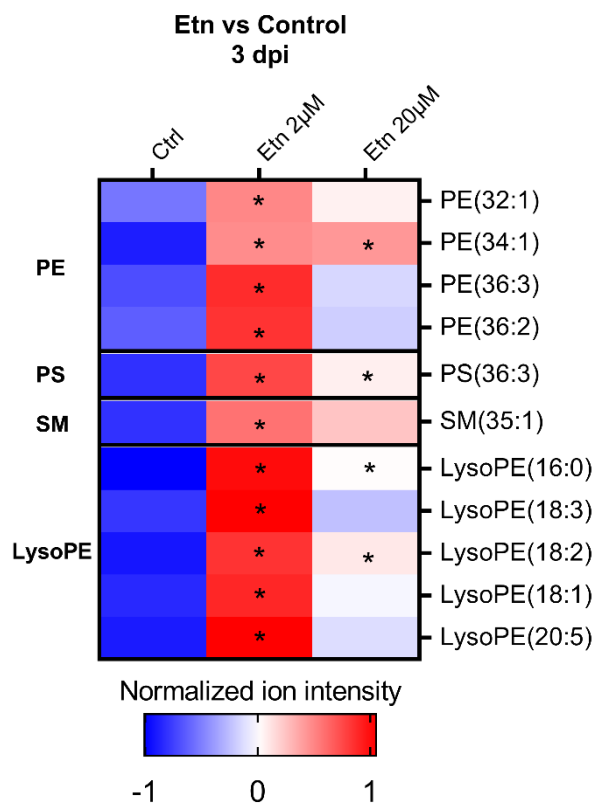

95

96 **Fig S11. Ion intensity of regulated metabolites at 3 dpi on ethanolamine-supplemented**  
 97 **DENV-infectious blood.** Normalized ion intensity was calculated after total ion  
 98 chromatography normalization and auto scaling from four biological replicates, each containing  
 99 10 mosquitoes. Conditions with significantly regulated metabolites ( $p$ -value  $<0.05$  and  $|\log_2$   
 100 fold change|  $>1$ ) were indicated with an asterisk. Etn, Ethanolamine; PE,  
 101 phosphatidylethanolamine; PS, phosphatidylserine; LysoPE, lysophosphatidylethanolamine;  
 102 SM, Sphingomyelin;

103

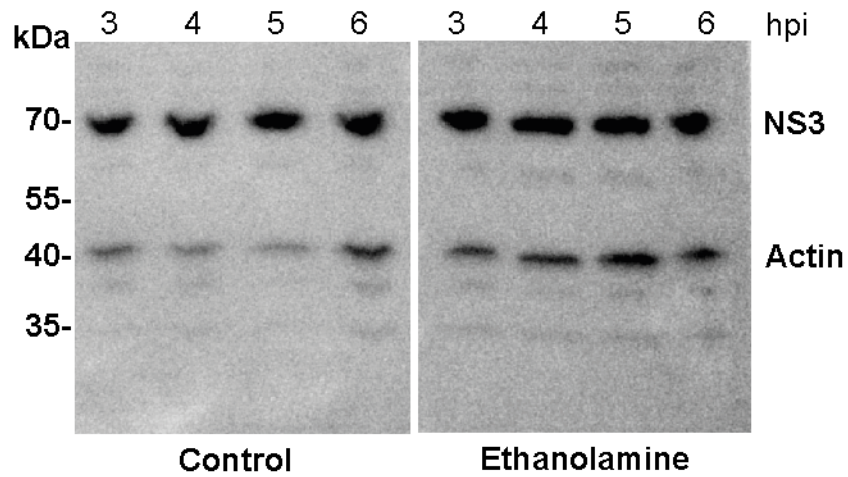

104

105 **Fig S12. Immunoblot of DENV NS3 expressed in DENV-infected Aag2 cells at 3, 4, 5 and**  
 106 **6 hpi.** 30µg of protein extracted from mosquito cells lysates (Aag2) were electrophoresed and  
 107 western blotted with anti-NS3 polyclonal antibody and detected by chemiluminescence. Anti-  
 108 beta actin was used as loading control.

109

110

111

112

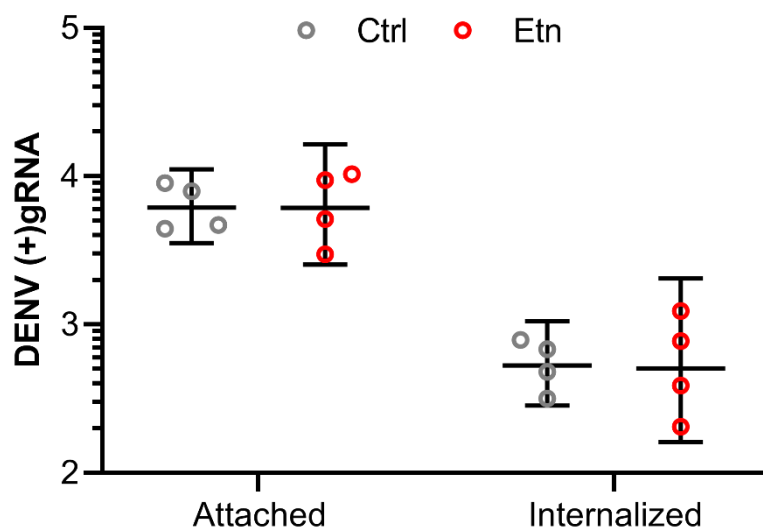

113

114 **Fig S13. Attachment and internalization for DENV propagated in ethanolamine-**  
115 **supplemented cells.** Aag2 cells were supplemented with either ethanolamine (Etn) or control  
116 media (Ctrl) for 24 h before infection with DENV. Viruses grown in Etn- or Ctrl-supplemented  
117 media were used to estimate attached and internalized (+)gRNA in Aag2 cells. Lines show  
118 geometric mean  $\pm$  95% CI from 4 biological repeats. Not significant as determined by unpaired  
119 t-test.

120

121

122

123

124

## 125 TABLES

126 **Table S1. CDP-aminoalcohol motif comparison between human and *Ae. Aegypti* CPT**  
127 **and EPT homologues.** Human choline/ethanolaminephosphotransferase (hCEPT1),  
128 cholinephosphotransferase (hCPT1) and ethanolaminephosphotransferase (hEPT1) are  
129 involved in the synthesise of PC and PE through the *de novo* PL pathway<sup>42,43</sup>. hCEPT1 has the  
130 dual ability to synthesize choline- and ethanolamine-containing phospholipids, while hCPT1  
131 exclusively synthesizes PC and hEPT1 exclusively synthesizes PE. hCEPT1 and hEPT1  
132 contain an identical CDP-alcohol phosphotransferase motif spanning residues 136-158 of  
133 hCEPT1<sup>26,42</sup>. hCPT1 differs in position 146 by a Cysteine instead of Serine, suggesting that  
134 this difference is responsible for CDP-Choline specificity. *Ae. aegypti* contains  
135 phosphotransferases (E/CPT1 and 2). Red indicates amino acids shared between E/CPT1-2  
136 and hEPT1 and hCEPT1. Green indicates amino acids specific to hCPT1. Yellow indicates  
137 amino acids specific to E/CPT1-2,

| Species             | Protein | RefSeq         | Amino acids | CDP-alcohol phosphotransferase motif                        |
|---------------------|---------|----------------|-------------|-------------------------------------------------------------|
| <i>Homo sapiens</i> | hCEPT1  | NP_001317672.1 | 416         | D G K Q A R R T N S <b>S</b> S P L G E L F D H G C D        |
| <i>Homo sapiens</i> | hEPT1   | NP_277040.1    | 406         | D G K Q A R R T N S <b>S</b> S P L G E L F D H G C D        |
| <i>Homo sapiens</i> | hCPT1   | NP_064629.2    | 397         | D G K Q A R R T N S <b>C</b> S P L G E L F D H G C D        |
| <i>Ae. aegypti</i>  | E/CPT1  | AAEL014395     | 378         | D G K Q A R R T N S <b>S</b> <b>T</b> P L G E L F D H G C D |
| <i>Ae. aegypti</i>  | E/CPT2  | AAEL011841     | 367         | D G K Q A R R T N S <b>S</b> <b>T</b> P L G E L F D H G C D |

138

139

140 **Table S2. <sup>13</sup>C isotope-labeled phospholipids after 24h supplementation of <sup>13</sup>C-**  
141 **ethanolamine or <sup>13</sup>C-choline in mock-infected Aag2 cells.**

| Supplementation | <sup>13</sup> C fully labeled |          | Non-labeled               |        |          |
|-----------------|-------------------------------|----------|---------------------------|--------|----------|
|                 | RT                            | Mass m/z | Annotation                | RT     | Mass m/z |
| Ethanolamine    | 2.976                         | 692.5139 | PE(18:1(9Z)/14:0)         | 2.939  | 690.5084 |
| Ethanolamine    | 2.842                         | 718.5323 | PE(16:0/18:2(9Z,12Z))     | 2.895  | 716.5224 |
| Ethanolamine    | 3.155                         | 720.5444 | PE(18:1(9Z)/16:0)         | 3.229  | 718.5375 |
| Ethanolamine    | 2.897                         | 720.5446 | PE(18:1(9Z)/16:0)         | 2.944  | 718.5377 |
| Ethanolamine    | 6.446                         | 744.5445 | PE(16:0/20:3(8Z,11Z,14Z)) | 6.499  | 742.5374 |
| Choline         | 11.184                        | 106.1078 | Choline                   | 11.167 | 104.1067 |
| Choline         | 7.634                         | 668.4445 | PC(16:0/9:0(COOH))        | 7.635  | 666.4341 |
| Choline         | 6.527                         | 706.5334 | PC(14:0/16:1(9Z))         | 6.514  | 704.5219 |
| Choline         | 6.503                         | 734.5647 | PC(14:0/18:1(11Z))        | 6.501  | 732.5535 |

142

143

144

145 **Table S3. Primers for dsRNA synthesis.**

| Gene name     | Gene code  | Fragment size | Forward primer       | Reverse primer        |
|---------------|------------|---------------|----------------------|-----------------------|
| <i>E/CK</i>   | AAEL009765 | 301           | GGCTTAGGGGATCGAGAGAC | GTCATCGTTGGCGTTATTGTT |
| <i>CT</i>     | AAEL011564 | 305           | CCGGTACGGTTGTACGGA   | CGCCTCAAGGTTTCGATTTA  |
| <i>E/CPT1</i> | AAEL014395 | 395           | ATCATCGCGAATGCAATTTT | CAGCTGTAGGGCATGGACTT  |

|               |            |     |                       |                      |
|---------------|------------|-----|-----------------------|----------------------|
| <i>E/CPT2</i> | AAEL011841 | 312 | GACCCTGTTCTACTGTGCC   | AACAGGAACGGTATGATGGG |
| <i>ET</i>     | AAEL005651 | 313 | ACGGAGCTCGGAGGCTTACT  | TCGTCAACCCATTTAATGCC |
| <i>PSD</i>    | AAEL010223 | 314 | GGTCTGACTCGACCGCTTT   | GCATTGTCGGGTGATTTCTT |
| <i>PSS</i>    | AAEL008393 | 337 | GTGGACGATATTTTCGCTGGA | TAAAATTCCGTAACGTGGGG |
| <i>LacZ</i>   | /          | 370 | TACCCGTAGGTAGTCACGCA  | TACGATGCGCCCATCTACAC |

146

147 **Table S4. Primers for qPCR.**

| Gene name     | Gene code  | Forward primer        | Reverse primer         |
|---------------|------------|-----------------------|------------------------|
| <i>E/CK</i>   | AAEL009765 | GGCTTAGGGGATCGAGAGAC  | GTCATCGTTGGCGTTATTGTT  |
| <i>CT</i>     | AAEL011564 | CCGGTACGGTTGTACGGA    | CGCCTCAAGGTTTCGATTTA   |
| <i>E/CPT1</i> | AAEL014395 | ATCATCGCGAATGCAATTTT  | CAGCTGTAGGGCATGGACTT   |
| <i>E/CPT2</i> | AAEL011841 | GACCCTGTTCTACTGTGCC   | AACAGGAACGGTATGATGGG   |
| <i>ET</i>     | AAEL005651 | ACGGAGCTCGGAGGCTTACT  | TCGTCAACCCATTTAATGCC   |
| <i>PSD</i>    | AAEL010223 | GGTCTGACTCGACCGCTTT   | GCATTGTCGGGTGATTTCTT   |
| <i>PSS</i>    | AAEL008393 | GTGGACGATATTTTCGCTGGA | TAAAATTCCGTAACGTGGGG   |
| <i>Actin</i>  | AAEL011197 | GAACACCCAGTCCTGCTGACA | TGCGTCATCTTCTCACGGTTAG |

148

149

150

## 151 DATASETS

152 **Dataset S1. Metabolites detected upon gene depletion of de novo PL pathways in DENV-**  
153 **infected cells at 48 hpi.** Details of the detected compounds: m/z, retention time (Rt in min),  
154 MS/MS spectrum fragmentation and intensity, adducts ion name, regulation of compounds (p-  
155 value < 0.05; |log2 fold change| ≥ 1) with dsRNA as compared to dsControl and annotation  
156 classes (3 rank) with MS-Finder.

157

158

159 **Dataset S2. Metabolites detected upon ethanolamine or choline supplementation before**  
160 **infection.** Details of the detected compounds: m/z, retention time (Rt in min), MS/MS spectrum  
161 fragmentation and intensity, adducts ion name, regulation of compounds (p-value < 0.05; |log2  
162 fold change| ≥ 1) with Etn or Cho supplementation as compared to Control and annotation  
163 classes (3 rank) with MS-Finder.

164

165 **Dataset S3. Metabolites detected upon ethanolamine and choline supplementations in**  
166 **DENV-infected cells at 6, 24 and 48 hpi.** Details of the detected compounds: m/z, retention  
167 time (Rt in min), MS/MS spectrum fragmentation and intensity, adducts ion name, regulation  
168 of compounds (p-value < 0.05; |log2 fold change| ≥ 1) with Etn or Cho supplementation as  
169 compared to Control at 6, 24 and 48 hpi and annotation classes (3 rank) with MS-Finder.

170

171 **Dataset S4. Non-labeled phospholipids after 24h supplementation of labeled**  
172 **ethanolamine or choline in mock-infected cells.** The two tabs contains details of the  
173 detected compounds in Etn or Cho supplemented cells: m/z, retention time (Rt in min), MS/MS  
174 spectrum fragmentation and intensity, adducts ion name, average ion intensity (TIC  
175 normalization) at 24h post-supplementation and annotation classes (3 rank) with MS-Finder.

176

177 **Dataset S5. Labeled and non-labeled metabolites detected upon <sup>13</sup>C-ethanolamine or**  
178 **<sup>13</sup>C-choline supplementations in DENV-infected cells at 1, 6, 24 and 48 hpi.** The four tabs  
179 contains details of the detected compounds in <sup>13</sup>C-Etn or <sup>13</sup>C-Cho supplemented cells and in  
180 <sup>12</sup>C-Etn or <sup>12</sup>C-Cho supplemented cells for the generation of the library: m/z, retention time (Rt  
181 in min), MS/MS spectrum fragmentation and intensity, adducts ion name, regulation of  
182 compounds (p-value < 0.05; |log2 fold change| ≥ 1) with <sup>13</sup>C-Etn or <sup>13</sup>C-Cho supplementation

183 as compared to Control at 1, 6, 24 and 48 hpi, average ion intensity (TIC normalization) in  
184 Mock or DENV condition at 1, 6, 24 or 48 hpi for <sup>12</sup>C-Etn or <sup>12</sup>C-Cho supplemented cells and  
185 annotation classes (3 rank) with MS-Finder.

186

187 **Dataset S6. Metabolites detected following ethanolamine blood supplementation in**  
188 **DENV-infected mosquitoes at 3 dpi.** Details of the detected compounds: m/z, retention time  
189 (Rt in min), MS/MS spectrum fragmentation and intensity, adducts ion name, regulation of  
190 compounds (p-value < 0.05; |log<sub>2</sub> fold change| ≥ 1) with 2μM or 20μM Etn supplementation as  
191 compared to Control at 3 dpi and annotation classes (3 rank) with MS-Finder.

192
